# Supplementary material
Source: Springer Nature journal article supplement (https://www.springermedizin.de/resource/supplementary/12904_2014_245_MOESM2_ESM.pdf/9517808)
Supplement: MOESM2 [file 9517808]

## Coding List of Independent Readers

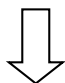

| Initial Theme List                     |
|----------------------------------------|
| 1) Caring                              |
| 2) Devalued                            |
| 3) Part of something good              |
| 4) Relatable                           |
| 5) Respect for persons                 |
| 6) Understand one another              |
| 7) Access to care                      |
| 8) Advocate for patient                |
| 9) Competent                           |
| 10) Conflicting information            |
| 11) Coordination of care               |
| 12) Follow thru in timely manner       |
| 13) Good communication                 |
| 14) Gratitude                          |
| 15) Open to suggestions                |
| 16) Outcomes                           |
| 17) Point person                       |
| 18) Poor communication                 |
| 19) Repetition                         |
| 20) Efficient                          |
| 21) Expect communication               |
| 22) Pain mangement                     |
| 23) Reporting                          |
| 24) Responsiveness                     |
| 25) Same goals                         |
| 26) Sense good communication           |
| 27) Sense of doing everything possible |
| 28) Treatment quality                  |
| 29) Variety of input                   |
| 30) Unsure about communication         |

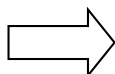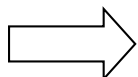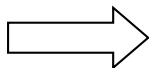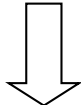

| Interim Theme List                     |
|----------------------------------------|
| 1) Caring                              |
| 2) Devalued                            |
| 3) Part of something good              |
| 4) Relatable                           |
| 5) Respect for persons                 |
| 6) Understand one another              |
| 7) Access to care                      |
| 8) Advocate for patient                |
| 9) Competent                           |
| 10) Conflicting information            |
| 11) Coordination of care               |
| 12) Follow thru in timely manner       |
| 13) Good communication                 |
| 14) Gratitude                          |
| 15) Open to suggestions                |
| 16) Outcomes                           |
| 17) Point person                       |
| 18) Poor communication                 |
| 19) Repetition                         |
| 20) Efficient                          |
| 21) Expert communication               |
| 22) Nursing documentation              |
| 23) Responsiveness                     |
| 24) Same goals                         |
| 25) Sense of good communication        |
| 26) Sense of doing everything possible |
| 27) Variety of input                   |

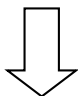

| Final Theme List                                            |
|-------------------------------------------------------------|
| 1) Importance of developing relationships                   |
| 2) Facilitating open communication                          |
| 3) Having quality communication                             |
| 4) Uncertainty about communication between healthcare teams |
